# Supplementary material
Source: HighWire-hosted journal article supplement (https://bmjopen.bmj.com/content/14/6/e082571)
Supplement: inline-supplementary-material-1 [file inline-supplementary-material-1.pdf]

## Appendix 1 – VarSheet

Reviewer: \_\_\_\_\_

## Variable Extraction for Literature Review

Project: \_\_\_\_\_

Notes:

Reviewer's Name  
1-13-2023

Project Name: \_\_\_\_\_

Paper 1

|                                  |                                    |                                   |                                    |
|----------------------------------|------------------------------------|-----------------------------------|------------------------------------|
| <input type="checkbox"/> Include | <b>Study Population</b>            |                                   |                                    |
|                                  | <input type="checkbox"/> Providers | <input type="checkbox"/> Patients | <input type="checkbox"/> Community |
| Title                            |                                    |                                   |                                    |
|                                  |                                    |                                   |                                    |
| Reviewer's Name                  |                                    | Recorded Date                     |                                    |
|                                  |                                    |                                   |                                    |

---

|                                       |                                   |                                   |
|---------------------------------------|-----------------------------------|-----------------------------------|
| <b>Extracted Variable 1</b>           | <b>Dependent Variable A</b>       |                                   |
|                                       |                                   |                                   |
| System Component                      | Relationship to Dep. Var A        |                                   |
| <input type="checkbox"/> Provider     | <input type="checkbox"/> Positive | <input type="checkbox"/> Negative |
| <input type="checkbox"/> Patient      |                                   |                                   |
| <input type="checkbox"/> System-level |                                   |                                   |
| <b>Explanation</b>                    | <b>Dependent Variable B</b>       |                                   |
|                                       |                                   |                                   |
|                                       | Relationship to Dep. Var B        |                                   |
|                                       | <input type="checkbox"/> Positive | <input type="checkbox"/> Negative |

---

|                                       |                                   |                                   |
|---------------------------------------|-----------------------------------|-----------------------------------|
| <b>Extracted Variable 2</b>           | <b>Dependent Variable A</b>       |                                   |
|                                       |                                   |                                   |
| System Component                      | Relationship to Dep. Var A        |                                   |
| <input type="checkbox"/> Provider     | <input type="checkbox"/> Positive | <input type="checkbox"/> Negative |
| <input type="checkbox"/> Patient      |                                   |                                   |
| <input type="checkbox"/> System-level |                                   |                                   |
| <b>Explanation</b>                    | <b>Dependent Variable B</b>       |                                   |
|                                       |                                   |                                   |
|                                       | Relationship to Dep. Var B        |                                   |
|                                       | <input type="checkbox"/> Positive | <input type="checkbox"/> Negative |

---

Project Name: \_\_\_\_\_

|                      |
|----------------------|
| Extracted Variable 3 |
|                      |

|                                       |
|---------------------------------------|
| System Component                      |
| <input type="checkbox"/> Provider     |
| <input type="checkbox"/> Patient      |
| <input type="checkbox"/> System-level |

|             |
|-------------|
| Explanation |
|             |

|                      |
|----------------------|
| Dependent Variable A |
|                      |

|                                   |                                   |
|-----------------------------------|-----------------------------------|
| Relationship to Dep. Var A        |                                   |
| <input type="checkbox"/> Positive | <input type="checkbox"/> Negative |

|                      |
|----------------------|
| Dependent Variable B |
|                      |

|                                   |                                   |
|-----------------------------------|-----------------------------------|
| Relationship to Dep. Var B        |                                   |
| <input type="checkbox"/> Positive | <input type="checkbox"/> Negative |

|                      |
|----------------------|
| Extracted Variable 4 |
|                      |

|                                       |
|---------------------------------------|
| System Component                      |
| <input type="checkbox"/> Provider     |
| <input type="checkbox"/> Patient      |
| <input type="checkbox"/> System-level |

|             |
|-------------|
| Explanation |
|             |

|                      |
|----------------------|
| Dependent Variable A |
|                      |

|                                   |                                   |
|-----------------------------------|-----------------------------------|
| Relationship to Dep. Var A        |                                   |
| <input type="checkbox"/> Positive | <input type="checkbox"/> Negative |

|                      |
|----------------------|
| Dependent Variable B |
|                      |

|                                   |                                   |
|-----------------------------------|-----------------------------------|
| Relationship to Dep. Var B        |                                   |
| <input type="checkbox"/> Positive | <input type="checkbox"/> Negative |

Project Name: \_\_\_\_\_

| Extracted Variable 5 |
|----------------------|
|                      |

| System Component                                                                                                                                                                                    |                          |          |                          |         |                          |              |
|-----------------------------------------------------------------------------------------------------------------------------------------------------------------------------------------------------|--------------------------|----------|--------------------------|---------|--------------------------|--------------|
| <table><tr><td><input type="checkbox"/></td><td>Provider</td></tr><tr><td><input type="checkbox"/></td><td>Patient</td></tr><tr><td><input type="checkbox"/></td><td>System-level</td></tr></table> | <input type="checkbox"/> | Provider | <input type="checkbox"/> | Patient | <input type="checkbox"/> | System-level |
| <input type="checkbox"/>                                                                                                                                                                            | Provider                 |          |                          |         |                          |              |
| <input type="checkbox"/>                                                                                                                                                                            | Patient                  |          |                          |         |                          |              |
| <input type="checkbox"/>                                                                                                                                                                            | System-level             |          |                          |         |                          |              |

| Explanation |
|-------------|
|             |

| Dependent Variable A |
|----------------------|
|                      |

| Relationship to Dep. Var A                                                                                                            |                          |          |                          |          |
|---------------------------------------------------------------------------------------------------------------------------------------|--------------------------|----------|--------------------------|----------|
| <table><tr><td><input type="checkbox"/></td><td>Positive</td></tr><tr><td><input type="checkbox"/></td><td>Negative</td></tr></table> | <input type="checkbox"/> | Positive | <input type="checkbox"/> | Negative |
| <input type="checkbox"/>                                                                                                              | Positive                 |          |                          |          |
| <input type="checkbox"/>                                                                                                              | Negative                 |          |                          |          |

| Dependent Variable B |
|----------------------|
|                      |

| Relationship to Dep. Var B                                                                                                            |                          |          |                          |          |
|---------------------------------------------------------------------------------------------------------------------------------------|--------------------------|----------|--------------------------|----------|
| <table><tr><td><input type="checkbox"/></td><td>Positive</td></tr><tr><td><input type="checkbox"/></td><td>Negative</td></tr></table> | <input type="checkbox"/> | Positive | <input type="checkbox"/> | Negative |
| <input type="checkbox"/>                                                                                                              | Positive                 |          |                          |          |
| <input type="checkbox"/>                                                                                                              | Negative                 |          |                          |          |

| Notes |
|-------|
|       |
