# Supplementary material
Source: HighWire-hosted journal article supplement (https://bmjopen.bmj.com/content/14/6/e082571)
Supplement: inline-supplementary-material-2 [file inline-supplementary-material-2.pdf]

Appendix 2  
MS Access Form  
Basic Information Form

Basic Information

ID1ID set by Anit11Paper TypeResearch

TitleAntenatal Hypertension Toolkit Utilization Improves Outcomes of Women At Risk for Hypertensive Disorder Pregnancy

First Author Last NamePersadFirst Author First NameMalini D.

Other AuthorsAdeyeye, Adeola F.;Dong, Yanling; Persad, Shridevi

Published Year2020JournalAmerican Journal of Obstetrics & Gynecology (Poster Session)Impact Factor

Keywords

Study AimTo determine if an antenatal hypertension toolkit improves management and outcomes of women at risk for hypertensive disorders of pregnancy.

Abstract - Introduction

Abstract - MethodA retrospective cohort study was performed on pregnant women presenting for routine care at a university from 2017-2018. Included in the study were women with a confirmed intrauterine pregnancy with risk factors for hypertensive disorders of pregnancy. Excluded were any cases of fetal loss, anomalies or terminations. Women were stratified into moderate risk or high risk per an office based hypertension toolkit. Women in the high risk group included those with a history of preeclampsia, multiple gestation, chronic hypertension, pregestational diabetes, renal disease, and/or autoimmune disease. Women in the moderate risk group included those who were nulliparous, obese, had a family history of preeclampsia, advanced maternal age, and/or had a pregnancy interval of more than 5 years. Per the toolkit, low dose aspirin administration prior to 16 weeks was proposed for those with one risk factor in the high risk group or 2+ risk factors in the moderate risk group. Adherence to the toolkit's recommendation

Abstract - FindingA total 94 women were included in the study. The incidence of hypertensive disorders of pregnancy in this study was 30.9%. Maternal characteristics associated with missed intervention opportunities included nulliparity, multiple gestation pregnancy and having pregestational diabetes, Table 1. Adherence to the antenatal toolkit recommendations were associated with a significant reduction in the incidence of hypertensive disorders of pregnancy (20.0% vs. 43.2%, p0.01), Table 2.

Lee YJ, et al. BMJ Open 2024; 14:e082571. doi: 10.1136/bmjopen-2023-082571

Variables and Relationships with Dependent Variable Form

Report - Var, Dependent Var, Dependent Var Group

L1

ID set by Anita

11

First Author Last Name

Persad

2020

☒ Included

|       |                                           |                       |                                     |                             |                   |
|-------|-------------------------------------------|-----------------------|-------------------------------------|-----------------------------|-------------------|
| Var 1 | Provider Adherence to Clinical Guidelines | Dependant Variable 1A | At Risk Pregnant Women's Knowledge  | Dependent Variable Group 1A | Behavioral Belief |
|       |                                           | Dependant Variable 1B | Incidence of Hypertensive Disorders | Dependent Variable Group 1B |                   |
| Var 2 |                                           | Dependant Variable 2A |                                     | Dependent Variable Group 2A |                   |
|       |                                           | Dependant Variable 2B |                                     | Dependent Variable Group 2B |                   |
| Var 3 |                                           | Dependant Variable 3A |                                     | Dependent Variable Group 3A |                   |
| Var 4 |                                           | Dependant Variable 4A |                                     | Dependent Variable Group 4A |                   |
| Var 5 |                                           | Dependant Variable 5A |                                     | Dependent Variable Group 5A |                   |
| Var 6 |                                           | Dependant Variable 6A |                                     | Dependent Variable Group 6A |                   |
