# Supplementary material
Source: HighWire-hosted journal article supplement (https://bmjopen.bmj.com/content/14/6/e082571)

## Appendix 3 – Example of a causal map

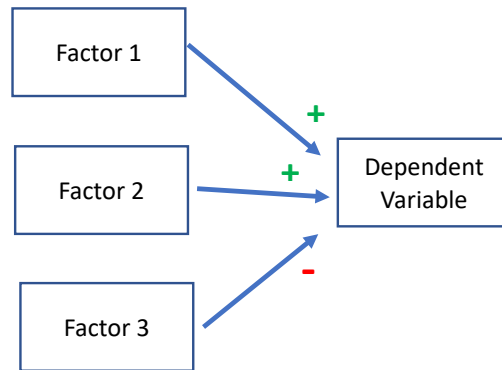

Supplement: inline-supplementary-material-3 [file inline-supplementary-material-3.pdf]
